# Supplementary material
Source: PubMed Central journal article supplement (PMC6641116)
Supplement: ao7b00329_si_001.pdf [file ao7b00329_si_001.pdf]

# Fabrication of highly-flexible hierarchical polypyrrole/carbon nanotube on eggshell membranes for supercapacitors

*José Jarib Alcaraz-Espinoza<sup>†‡</sup>, Celso Pinto de Melo <sup>†</sup> and Helinando Pequeno de  
Oliveira <sup>‡\*</sup>*

<sup>†</sup> Departamento de Física, Universidade Federal de Pernambuco, 50670-901 Recife,  
Pernambuco, Brazil.

<sup>‡</sup> Instituto de Pesquisa em Ciência dos Materiais, Universidade Federal do Vale do São  
Francisco, 48920-310, Juazeiro, Bahia, Brazil.

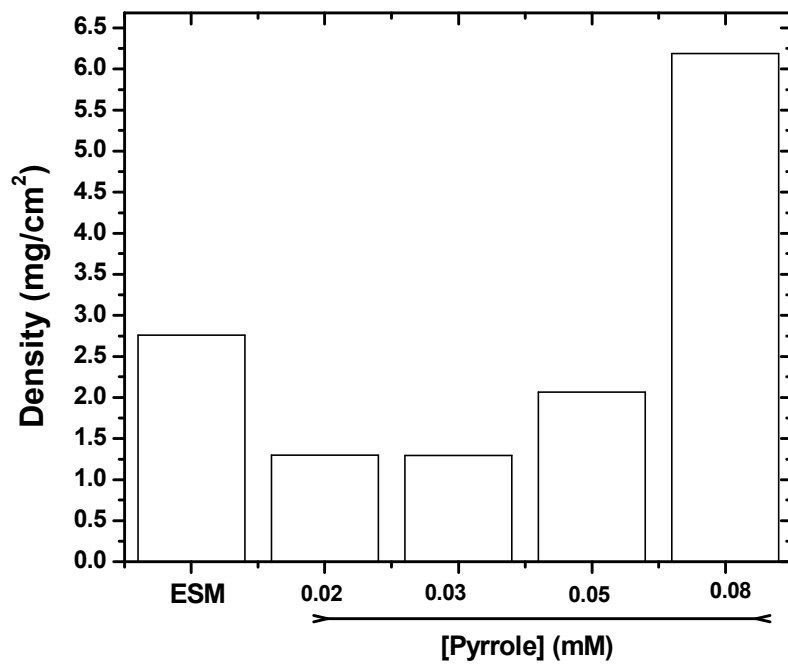

Figure S1 – Mass density of active material deposited on ESM membrane

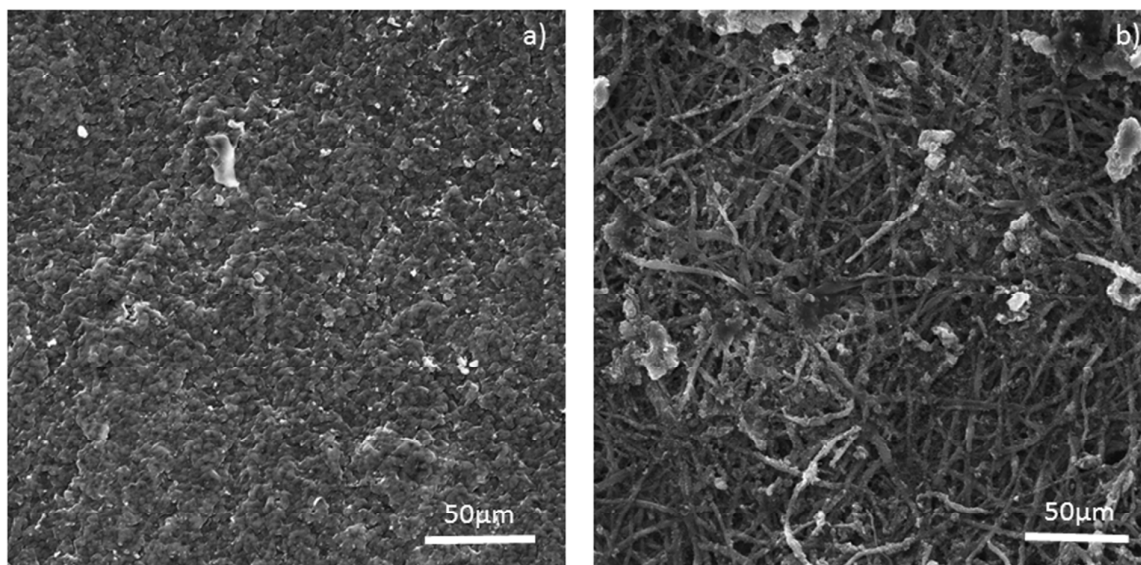

Figure S2 – SEM images of PPY-ESM (a) and PPY-*f*-MWCNT ESM surface (b).

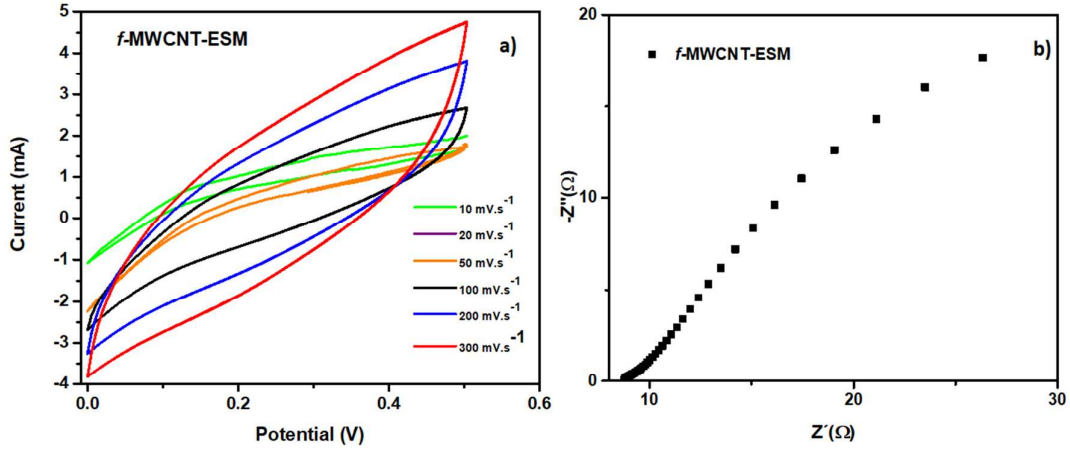

Figure S3 —C-V (a) and R-X (b) diagram of a flexible *f*-MWCNT ESM supercapacitor.

### Supercapacitor calculations

All supercapacitors were prepared with 1 cm<sup>2</sup> electrodes and characterized with a current density of 0.5 mA.cm<sup>-2</sup>.

$$C_{sp} \left( \frac{F}{g} \right) = \frac{4I}{m \left( \frac{dV}{dt} \right)}, \quad Eq.S1$$

where  $C_{sp}$ ,  $m$ ,  $V$ ,  $t$  and  $I$  are the specific capacitance for one electrode, the combined mass of two electrodes, the potential window and the time of discharge, respectively.

$$C_A = \frac{2 \cdot I \cdot t}{V \cdot A}, \quad Eq.S2$$

where  $C_A$  and  $A$  are the areal capacitance and the area of the device.  $I$ ,  $t$  and  $V$  have been previously defined in Eq. S1.

$$C_v = \frac{I \cdot t}{V \cdot v}, \quad Eq.S3$$

where  $C_v$  and  $V$  are the volumetric capacitance and the volume of the whole supercapacitor cell.  $I$ ,  $t$ , and  $V$  have been previously defined in Eq. S1.
